# Supplementary material
Source: PubMed Central journal article supplement (PMC2740557)

Figure S1

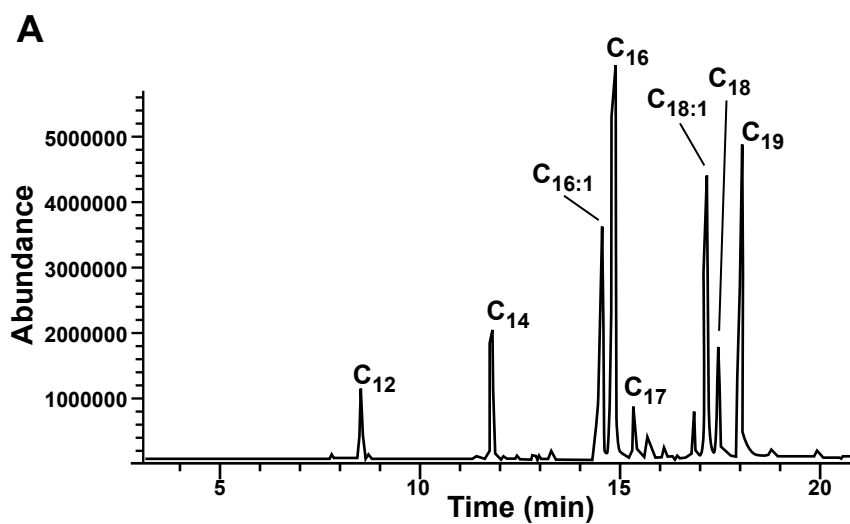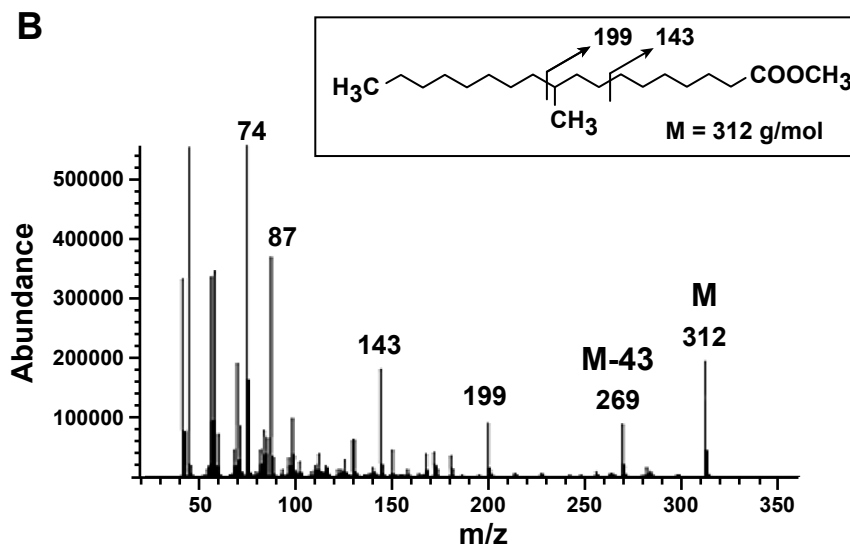

Figure S2

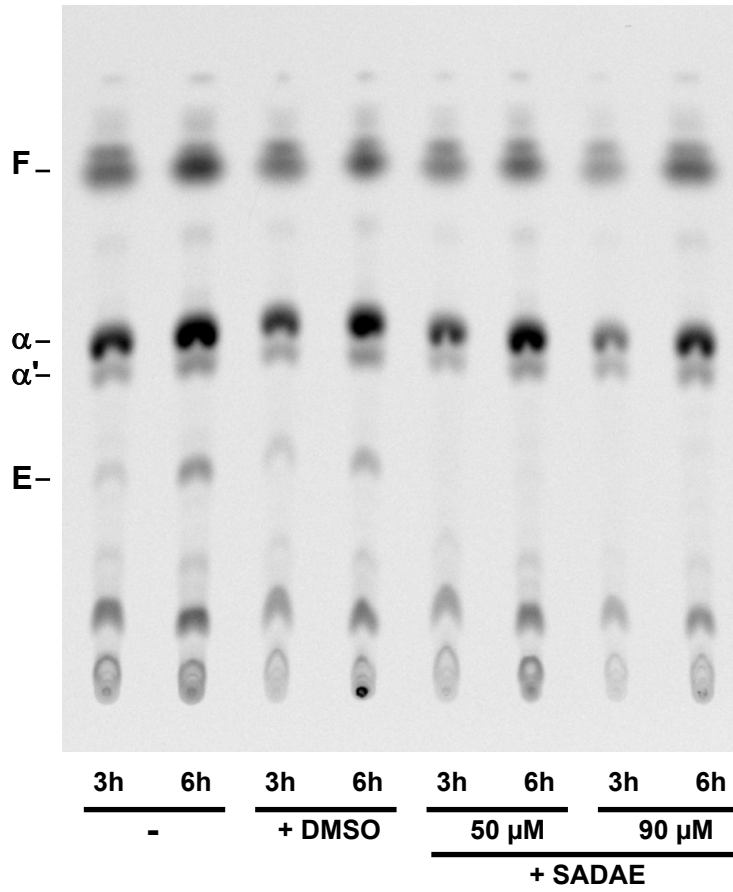

Figure S3

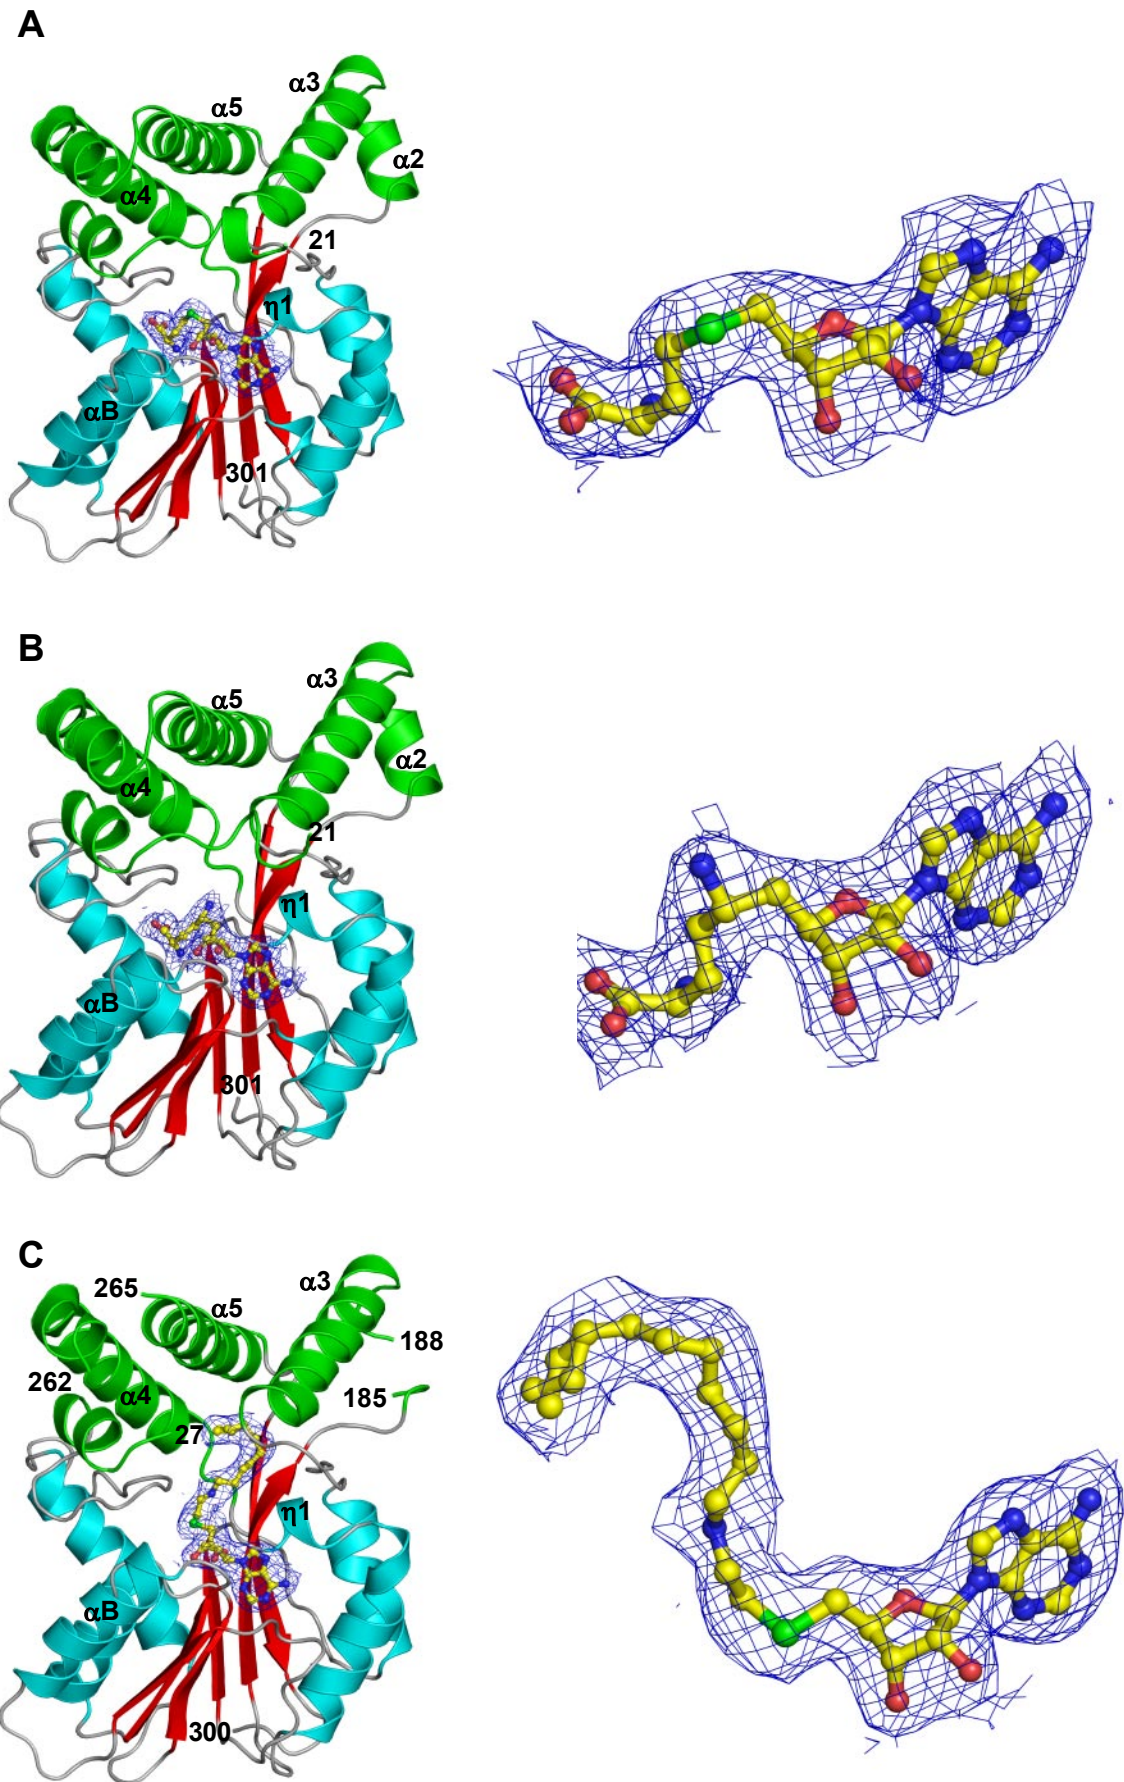

Supplement: supp_M809599200_suppdata.pdf [file supp_M809599200_suppdata.pdf]
